# Supplementary material for: Sustainable activated carbons prepared from a sucrose-derived hydrochar: remarkable adsorbents for pharmaceutical compounds
Source: Royal Society of Chemistry journal article supplement (doi:10.1039/c4ra14495c), 2015-01-01
Supplement: c4ra14495c1.pdf [file c4ra14495c1.pdf]

**Supporting Information**

**Sustainable activated carbons prepared from a sucrose-  
derived hydrochar: remarkable adsorbents for  
pharmaceutical compounds**

**Ana S. Mestre<sup>a,b\*</sup>, Emil Tyszko<sup>a</sup>, Marta A. Andrade<sup>a</sup>, Margarida Galhetas<sup>a</sup>,  
Cristina Freire<sup>b</sup>, Ana P. Carvalho<sup>a\*</sup>**

<sup>a</sup> Centro de Química e Bioquímica, Faculdade de Ciências, Universidade de Lisboa,  
1749-016 Lisboa (Portugal)

<sup>b</sup> REQUIMTE/LAQV, Departamento de Química e Bioquímica, Faculdade de Ciências,  
Universidade do Porto, 4169-007 (Portugal)

## Kinetic and equilibrium models

**Table S1. Kinetic and isotherm models in their non-linear and linear forms.**

|          | Model               | Non-linear form                      | Linear form                                                         | Ref. |
|----------|---------------------|--------------------------------------|---------------------------------------------------------------------|------|
| Kinetic  | Pseudo-first order  | $\frac{dq_t}{dt} = k_1(q_e - q_t)$   | $\log(q_e - q_t) = \log(q_e) - \left(\frac{k_1}{2.303}\right)t$     | 1    |
|          | Pseudo-second order | $\frac{dq_t}{dt} = k_2(q_e - q_t)^2$ | $\frac{t}{q_t} = \frac{1}{k_2 q_e^2} + \left(\frac{1}{q_e}\right)t$ | 1    |
| Isotherm | Langmuir            | $q_e = \frac{b q_m C_e}{1 + b C_e}$  | $\frac{C_e}{q_e} = \frac{1}{K_L q_m} + \frac{1}{q_m} C_e$           | 2    |
|          | Freundlich          | $q_e = K_F(C_e)^{1/n}$               | $\ln(q_e) = \ln(K_F) + \frac{1}{n} \ln(C_e)$                        | 3    |

*Kinetic parameters:*  $k_1$  - pseudo-first order rate constant ( $\text{h}^{-1}$ ),  $k_2$  - pseudo-second order rate constant ( $\text{g mg}^{-1} \text{h}^{-1}$ ),  $q_e$  and  $q_t$  - adsorbate uptake ( $\text{mg g}^{-1}$ ) at equilibrium and at time  $t$  (h).

*Isotherm parameters:*  $q_e$  - uptake at equilibrium ( $\text{mg g}^{-1}$ ),  $K_L$  - Langmuir constant ( $\text{dm}^3 \text{mg}^{-1}$ ),  $K_F$  - Freundlich constant ( $\text{mg}^{1-1/n} (\text{dm}^3)^{1/n} \text{g}^{-1}$ ),  $n$  - Freundlich exponent,  $q_m$  - monolayer adsorption capacity ( $\text{mg g}^{-1}$ ),  $C_e$  - solution concentration at equilibrium ( $\text{mg g}^{-1}$ ).

## SEM images of sucrose-derived carbons obtained by KOH activation at increasing temperatures

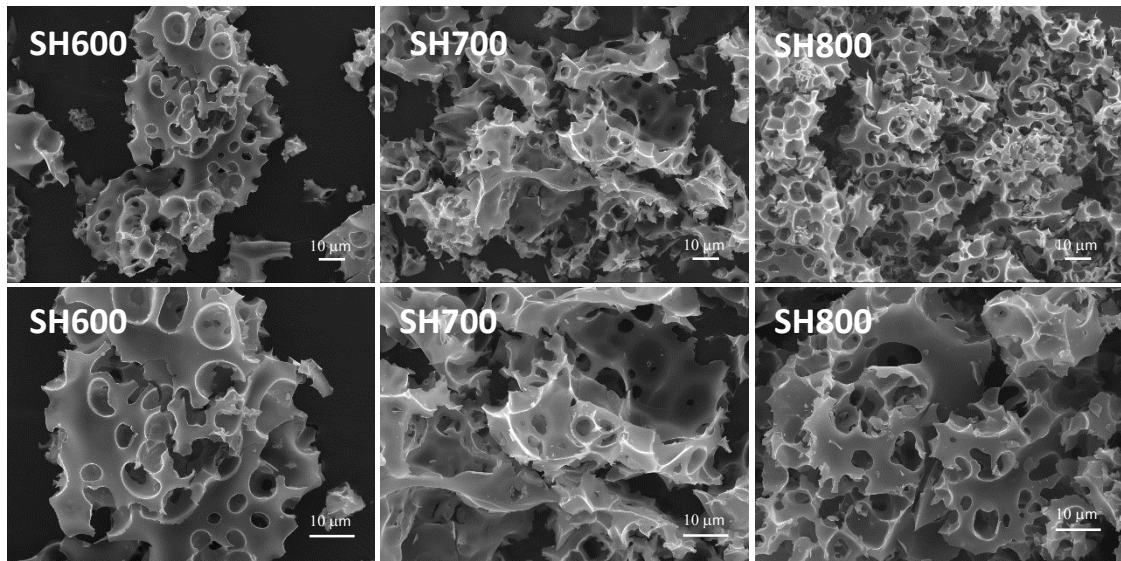

**Figure S1.** SEM images of sucrose-derived carbons obtained by KOH activation at 600 °C (SH600), 700 °C (SH700) and 800 °C (SH800).

## Relationship between the octanol-water partition coefficient and water solubility

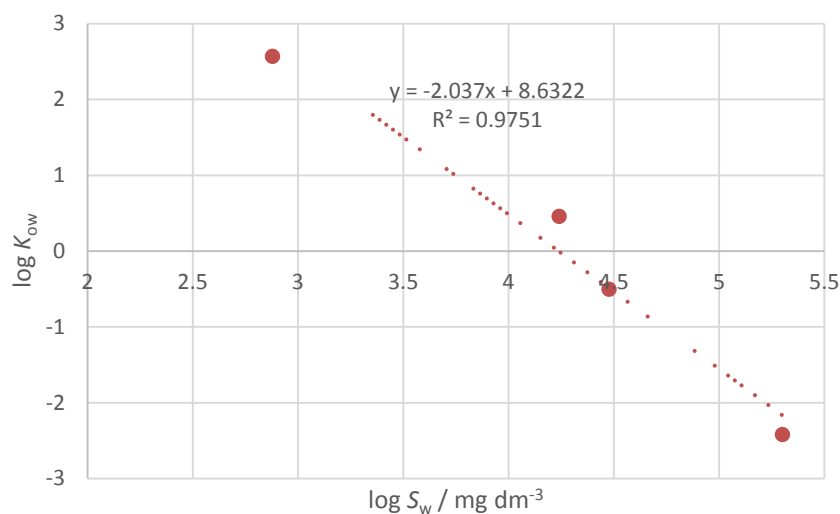

**Figure S2.** The relation between the octanol-water partition coefficient ( $\log K_{ow}$ ) and water solubility ( $\log S_w$ ) for paracetamol, clofibric acid, caffeine and iopamidol (molecular pharmaceutical compounds). The line was obtained by regression  $\log K_{ow}$  on  $\log S_w$ .

## Screening studies of PhACs removal using 9 cm<sup>3</sup> of PhAC solution

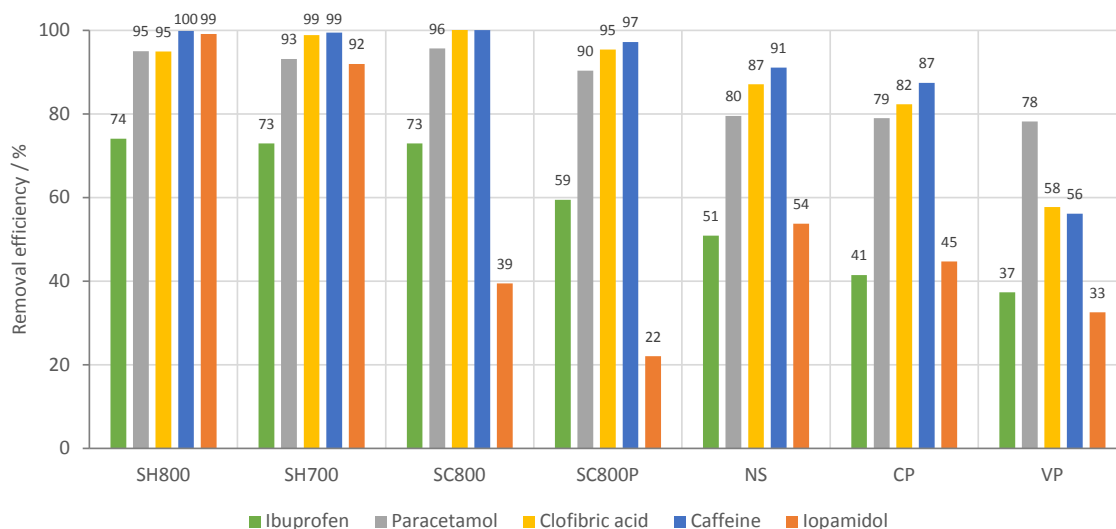

**Figure S3.** Removal efficiency of the mentioned activated carbons for the five PhACs (6 mg carbon/9 cm<sup>3</sup> of PhAC solution with 180 mg dm<sup>-3</sup>, 24 h of contact time at 30 °C).

## Screening studies of PhACs removal using 30 cm<sup>3</sup> of PhAC solution

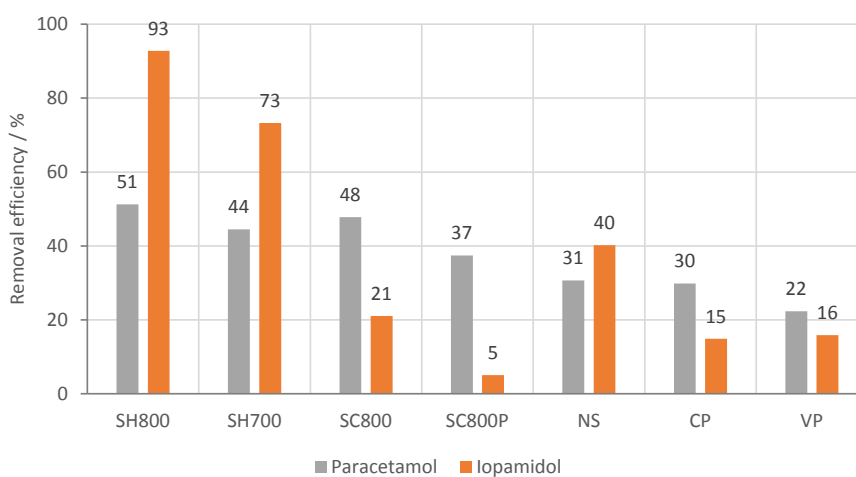

**Figure S4.** Removal efficiency of the mentioned activated carbons for paracetamol and iopamidol (6 mg carbon/30 cm<sup>3</sup> of PhAC solution with 180 mg dm<sup>-3</sup>, 24 h contact time at 30 °C).

## Linear trend between removal efficiency and $V_{\alpha \text{ super}} + V_{\text{meso}}$ for iopamidol

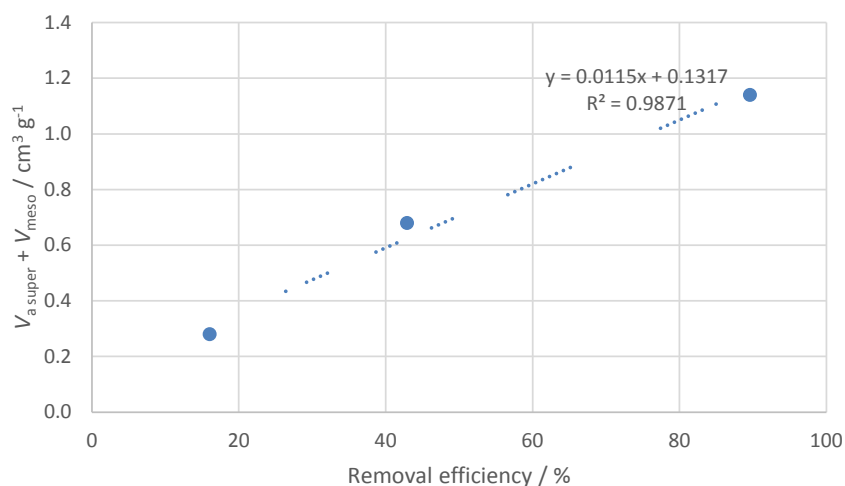

**Figure S5.** Correlation between the removal efficiency and  $V_{\alpha \text{ super}} + V_{\text{meso}}$  for iopamidol (6 mg carbon/9 cm<sup>3</sup> of PhAC solution with 180 mg dm<sup>-3</sup>, 24 h of contact time at 30 °C).

## References

1. Y.-S. Ho, *J. Hazard. Mater.*, 2006, **136**, 681-689.
2. I. Langmuir, *J. Am. Chem. Soc.*, 1918, **40**, 1361-1403.
3. H. M. F. Freundlich, *J. Phys. Chem.*, 1906, **57**, 385-470.
